# Supplementary material for: Differentiated Effects of Robot Hand Training With and Without Neural Guidance on Neuroplasticity Patterns in Chronic Stroke
Source: PubMed Central journal article supplement (PMC6186842; doi:10.3389/fneur.2018.00810), 2018-10-08
Supplement: Image_1.pdf [file Image_1.pdf]

*Supplementary Material*

**Differentiated Effects of Robot Hand Training With and Without Neural Guidance on Neuroplasticity Patterns in Chronic Stroke**

**Xin Wang<sup>1</sup>, Wan-wa Wong<sup>1</sup>, Rui Sun<sup>1</sup>, Winnie Chiu-wing Chu<sup>2</sup>, Raymond Kai-yu Tong<sup>1,3,\*</sup>**

\* **Correspondence:** Raymond Kai-yu Tong: [kytong@cuhk.edu.hk](mailto:kytong@cuhk.edu.hk)

**1 Supplementary Figures**

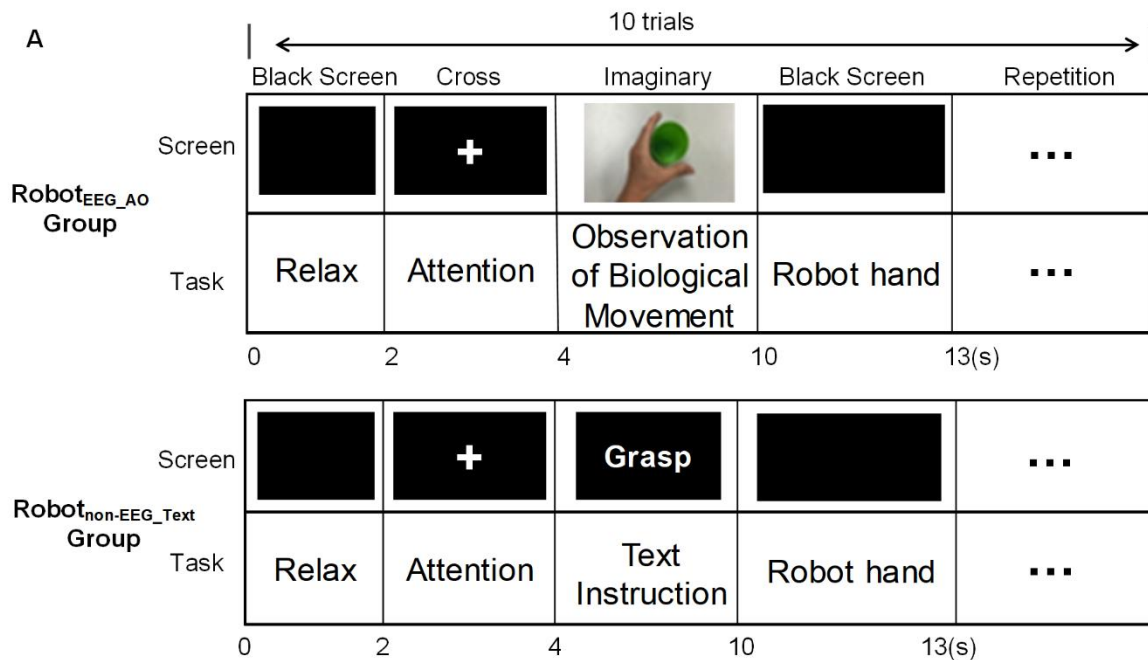**B**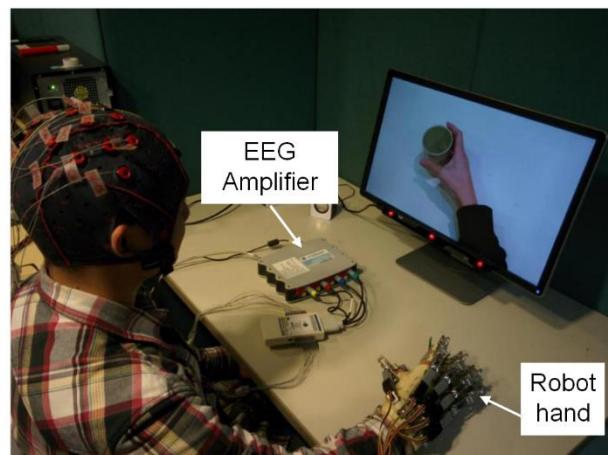

**Supplementary Figure 1.** Experimental setup. **(A)** Experimental paradigm for two groups. During each session, 100 repetitive movements were performed by each subject with intermittent rest after every 10 trials. For Robot<sub>EEG\_AO</sub> group, real-time EEG were collected during imaginary and used to guide and trigger the robot hand to help grasp or release. During their imaginary, a video demonstrating either grasping or releasing a cup using the subjects' unaffected hand was applied as action observation. For Robot<sub>non-EEG\_Text</sub> group, no guidance from the EEG and the robot hand was triggered randomly. During their imaginary, only text instruction rather than action observation was applied. **(B)** The training system for hand training.
