# Supplementary material for: Differentiated Effects of Robot Hand Training With and Without Neural Guidance on Neuroplasticity Patterns in Chronic Stroke
Source: PubMed Central journal article supplement (PMC6186842; doi:10.3389/fneur.2018.00810), 2018-10-08
Supplement: Table_1.pdf [file Table_1.pdf]

*Supplementary Material*

**Differentiated Effects of Robot Hand Training With and Without Neural Guidance on Neuroplasticity Patterns in Chronic Stroke**

**Xin Wang<sup>1</sup>, Wan-wa Wong<sup>1</sup>, Rui Sun<sup>1</sup>, Winnie Chiu-wing Chu<sup>2</sup>, Raymond Kai-yu Tong<sup>1,3,\*</sup>**

\* **Correspondence:** Raymond Kai-yu Tong: [kytong@cuhk.edu.hk](mailto:kytong@cuhk.edu.hk)

**1 Supplementary Table**

**Supplementary Table 1** Region of Interest with corresponding subnetworks

| <b>Index</b> | <b>FreeSurfer Labels</b>                              | <b>AAL Labels</b>                  | <b>Subnetworks</b>   |
|--------------|-------------------------------------------------------|------------------------------------|----------------------|
| 1            | Superior frontal gyrus (F1)                           | Frontal Sup<br>Frontal Sup Med     | Default Mode Network |
| 2            | Anterior part of the cingulate gyrus and sulcus (ACC) | Frontal Med Orb<br>Cingulum Ant    |                      |
| 3            | Straight gyrus<br>Gyrus rectus                        | Rectus                             |                      |
| 4            | Posterior-dorsal part of the cingulate gyrus (dPCC)   | Cingulum Post                      |                      |
| 5            | Angular gyrus                                         | Angular                            |                      |
| 6            | Precuneus                                             | Precuneus                          |                      |
| 7            | Middle temporal gyrus (T2)                            | Temporal Mid                       |                      |
| 8            | Temporal pole                                         | Temporal Pol<br>Mid                |                      |
| 9            | Precentral gyrus                                      | Precentral                         | Sensory-Motor Areas  |
| 10           | Postcentral gyrus                                     | Postcentral                        |                      |
| 11           | Paracentral lobule and sulcus                         | Paracentral Lob                    |                      |
| 12           | Orbital gyri                                          | Frontal Sup Orb<br>Frontal Inf Orb | Attention Network    |
| 13           | Middle frontal gyrus (F2)                             | Frontal Mid                        |                      |
| 14           | Fronto-marginal gyrus (of Wernicke) and sulcus        | Frontal Mid Orb                    |                      |

|    |                                                                           |                   |                  |
|----|---------------------------------------------------------------------------|-------------------|------------------|
| 15 | Opercular part of the inferior frontal gyrus                              | Frontal Inf Oper  |                  |
| 16 | Triangular part of the inferior frontal gyrus                             | Frontal Inf Tri   |                  |
| 17 | Superior parietal lobule (lateral part of P1)                             | Parietal Sup      |                  |
| 18 | Intraparietal sulcus (interparietal sulcus) and transverse parietal sulci | Parietal Inf      |                  |
| 19 | Subcentral gyrus (central operculum) and sulci                            | Rolandic Oper     | Auditory Network |
| 20 | Superior segment of the circular sulcus of the insula                     | Insula            |                  |
| 21 | Short insular gyri                                                        | Insula            |                  |
| 22 | Supramarginal gyrus                                                       | SupraMarginal     |                  |
| 23 | Anterior transverse temporal gyrus (of Heschl)                            | Heschl            |                  |
| 24 | Lateral aspect of the superior temporal gyrus                             | Temporal Sup      |                  |
| 25 | Planum polare of the superior temporal gyrus                              | Temporal Pole Sup |                  |
| 26 | Calcarine sulcus                                                          | Calcarine         | Visual Network   |
| 27 | Cuneus (O6)                                                               | Cuneus            |                  |
| 28 | Lingual gyrus, lingual part of the medial occipito-temporal gyrus, (O5)   | Lingual           |                  |
| 29 | Superior occipital gyrus (O1)                                             | Occipital Sup     |                  |
| 30 | Middle occipital gyrus (O2, lateral occipital gyrus)                      | Occipital Mid     |                  |
| 31 | Inferior occipital gyrus (O3) and sulcus                                  | Occipital Inf     |                  |

|    |                                                                                         |                 |                     |
|----|-----------------------------------------------------------------------------------------|-----------------|---------------------|
| 32 | Lateral occipito-temporal gyrus (fusiform gyrus, O4-T4)                                 | Fusiform        |                     |
| 33 | Subcallosal area, subcallosal gyrus                                                     | Olfactory       | Subcortical Network |
| 34 | Middle-posterior part of the cingulate gyrus and sulcus (pMCC)                          | Cingulum Mid    |                     |
| 35 | Hippocampus, Amygdala                                                                   | Hippocampus     |                     |
| 36 | Parahippocampal gyrus, parahippocampal part of the medial occipito-temporal gyrus, (T5) | ParaHippocampal |                     |
| 37 | Amygdala                                                                                | Amygdala        |                     |
| 38 | Caudate                                                                                 | Caudate         |                     |
| 39 | Putamen                                                                                 | Putamen         |                     |
| 40 | Pallidum                                                                                | Pallidum        |                     |
| 41 | Thalamus-Proper                                                                         | Thalamus        |                     |
| 42 | Inferior temporal gyrus (T3)                                                            | Temporal Inf    |                     |
